# Supplementary material for: Glycemic responses to strenuous training in male professional cyclists with type 1 diabetes: a prospective observational study
Source: PubMed Central journal article supplement — BMJ Open Diabetes Res Care. 2020 Apr 16;8(1):e001245. doi: 10.1136/bmjdrc-2020-001245 (PMC7199179; doi:10.1136/bmjdrc-2020-001245), 2020-04-16
Supplement: bmjdrc-2020-001245supp001.pdf [file bmjdrc-2020-001245supp001.pdf]

# Supplementary material

## 1.1 Overall energy intake and macronutrient composition

A descriptive table of overall energy intake and macronutrient composition is reported in Table 1

| Total energy intake |               |           |           |         |
|---------------------|---------------|-----------|-----------|---------|
| Camp Day            | Energy (kcal) | CHO (g)   | Fat (g)   | Pro (g) |
| Day 1               | 4004±1017*    | 637±162*† | 59±15     | 139±36● |
| Day 2               | 4609±1061*    | 839±202†  | 111±27#\$ | 210±54  |
| Day 3               | 4734±1328*    | 651±189*† | 92±25#\$  | 155±43● |
| Day 4               | 4133±731*     | 686±125*  | 73±13     | 129±28● |
| Day 5               | 4793±887*     | 691±116*  | 118±28#\$ | 163±34● |
| Day 6               | 4141±489*     | 740±83*   | 65±6      | 156±15● |
| Day 7               | 4578±473*     | 604±82*†  | 102±10#\$ | 197±12‡ |
| Day 8               | 4619±543*     | 703±109*  | 94±13#\$  | 227±21‡ |
| Day 9               | 6177±811      | 938±162   | 83±9#     | 198±24‡ |
| Overall             | 4636±1035     | 720±171   | 89±263    | 174±45  |
| P value             | <0.001        | <0.001    | <0.001    | <0.001  |

Table 1. Overall and day-by-day macronutrient intake over the 9-day training camp. Data is inclusive of standardised meals and in-ride energy intake. Data is reported as mean ± SD. n=16. \*p≤0.05 in the number of kcals consumed on the identified day versus the amount consumed on day 9. † p≤0.05 in the amount of CHO consumed on the identified day versus the amount consumed on day 2. ‡ p≤0.05 in the amount of protein consumed on the identified day versus the amount consumed on day 1. ● p≤0.05 in the amount of protein consumed on the identified day versus the amount consumed on day 2. # p≤0.05 in the amount of fat consumed versus the amount consumed on day 1. \$ p≤0.05 in the amount of protein consumed on the identified day versus the amount consumed on day 6.

## 1.2 Exercise physiological responses to cycle training sessions

The physical and physiological responses to cycle training sessions are reported in Table 2

| The physical and physiological responses to cycle training sessions |                 |                  |                          |                         |                             |                            |        |        |        |        |         |       |
|---------------------------------------------------------------------|-----------------|------------------|--------------------------|-------------------------|-----------------------------|----------------------------|--------|--------|--------|--------|---------|-------|
| Day N                                                               | Duration<br>(h) | Distance<br>(km) | P <sub>mean</sub><br>(w) | P <sub>max</sub><br>(w) | HR <sub>mean</sub><br>(bpm) | HR <sub>max</sub><br>(bpm) | HR Z1  | HR Z2  | HR Z3  | HR Z4  | HR Z5   | HR Z6 |
|                                                                     |                 |                  |                          |                         |                             |                            | ≤63%   | 64-77% | 78-87% | 88-97% | 98-105% | ≥106% |
| Day 1                                                               | 4.2             | 134              | 197                      | 726                     | 140                         | 178                        | 90     | 67     | 70     | 25     | 2       | 0     |
| Day 2                                                               | 5.5             | 164              | 191                      | 943                     | 140                         | 179                        | 114    | 110    | 77     | 24     | 3       | 1     |
| Day 3                                                               | 2.0             | 56               | 148                      | 591                     | 112                         | 146                        | 106    | 15     | 0      | 0      | 0       | 0     |
| Day 4                                                               | 5.8             | 182              | 209                      | 803                     | 142                         | 186                        | 122    | 106    | 75     | 37     | 4       | 2     |
| Day 5                                                               | 3.6             | 110              | 186                      | 707                     | 126                         | 159                        | 133    | 71     | 8      | 0      | 0       | 0     |
| Day 6                                                               | CPX             |                  |                          |                         |                             |                            |        |        |        |        |         |       |
| Day 7                                                               | 3.2             | 90               | 179                      | 835                     | 125                         | 174                        | 125    | 37     | 20     | 16     | 2       | 0     |
| Day 8                                                               | 4.5             | 144              | 199                      | 725                     | 125                         | 175                        | 119    | 91     | 30     | 7      | 0       | 0     |
| Day 9                                                               | 5.8             | 183              | 219                      | 858                     | 139                         | 177                        | 148    | 137    | 52     | 13     | 0       | 0     |
| Overall                                                             | 4.3±1.4         | 133±45           | 191±22                   | 773±109                 | 131±11                      | 172±13                     | 120±17 | 79±40  | 41±31  | 15±13  | 1±1     | 0±1   |

Table 2. Physical and physiological responses to cycle training. Data are presented as mean±SD. n=16. N; number. h; hours. km; kilometres. P; power. HR; heart rate. bpm; beats per minute. Z; zone. CPX; cardiopulmonary exercise testing. HR zones are presented as % maximum (HR<sub>max</sub>) and categorised as; Zone 1; ≤63%, Zone 2; 64-77%, Zone 3; 78-87%, Zone 4; 88-97%, Zone 5; 98-105%, Zone 6; ≥106%

### 1.3 Day by day glycaemic variance during training camp

The mean [*iG*] are reported for each day and night, and overall in Figure 1.

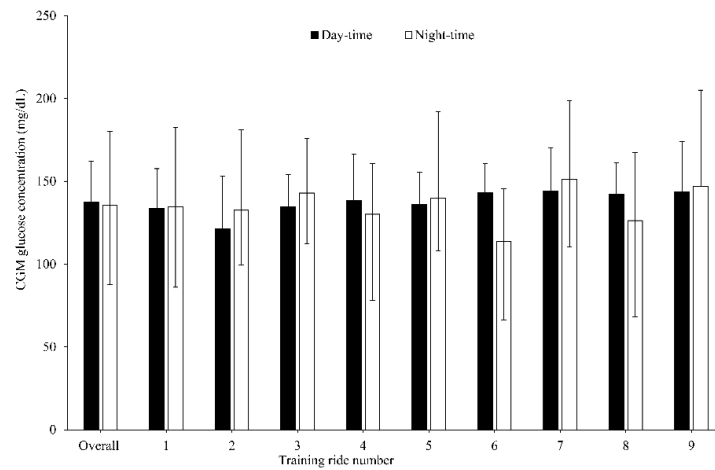

Figure 1. Interstitial glucose concentrations [*iG*] (mean±SD) over each day (06:00 to 23:59) and night (00:00 to 05:59) during 9 days of consecutive training.
